# Supplementary material
Source: HighWire-hosted journal article supplement (https://emj.bmj.com/content/36/2/82)
Supplement: inline-supplementary-material-2 [file inline-supplementary-material-2.docx]

Translated Abstract for Prolonged length of stay in the emergency department and increased risk of hospital mortality in patients with sepsis requiring ICU admission

摘要背景及目的   急诊室患者滞留在中国非常普遍。很多严重脓毒症及脓毒症休克的患者需要入住ICU获得专业的监护和治疗，对这些患者而言入住ICU延迟可能与不良的结局相关。 方法 我们从大数据研究平台中获取2010年至2018年从急诊科入住ICU，并考虑存在脓毒症的患者。主要观察终点为住院病死率。我们比较了存活组和死亡组急诊室滞留时间（EDLOS）的差别。同时我们采用多因素回归模型对混杂因素进行校正。 结果 一共入组了1997例患者，其中包含473个死亡病例和1524个存活患者。对于EDLOS<6小时的患者，其粗病死率为21.4%，明显低于EDLOS为12-24小时的患者（31.9%）和EDLOS>24小时的患者（31.8%）。当校正了氧合指数、血肌酐、年龄、SOFA评分、体重指数、乳酸、合并症和感染部位以后，EDLOS还是和死亡结局独立相关。与EDLOS<6小时的相比，EDLOS12-24小时（OR：1.82；95%CI：1.28-2.58）和>24小时（OR: 1.79； 95%CI：1.27-2.52）的患者其病死率显著增高。 结论 该研究提示，在需要入住ICU的脓毒症患者中，EDLOS延长与住院病死率升高有关。
